# Supplementary material for: The function of OsbHLH068 is partially redundant with its homolog, AtbHLH112, in the regulation of the salt stress response but has opposite functions to control flowering in Arabidopsis
Source: PubMed Central journal article supplement (PMC5504132; doi:10.1007/s11103-017-0624-6), 2017-06-19

# Biological Process

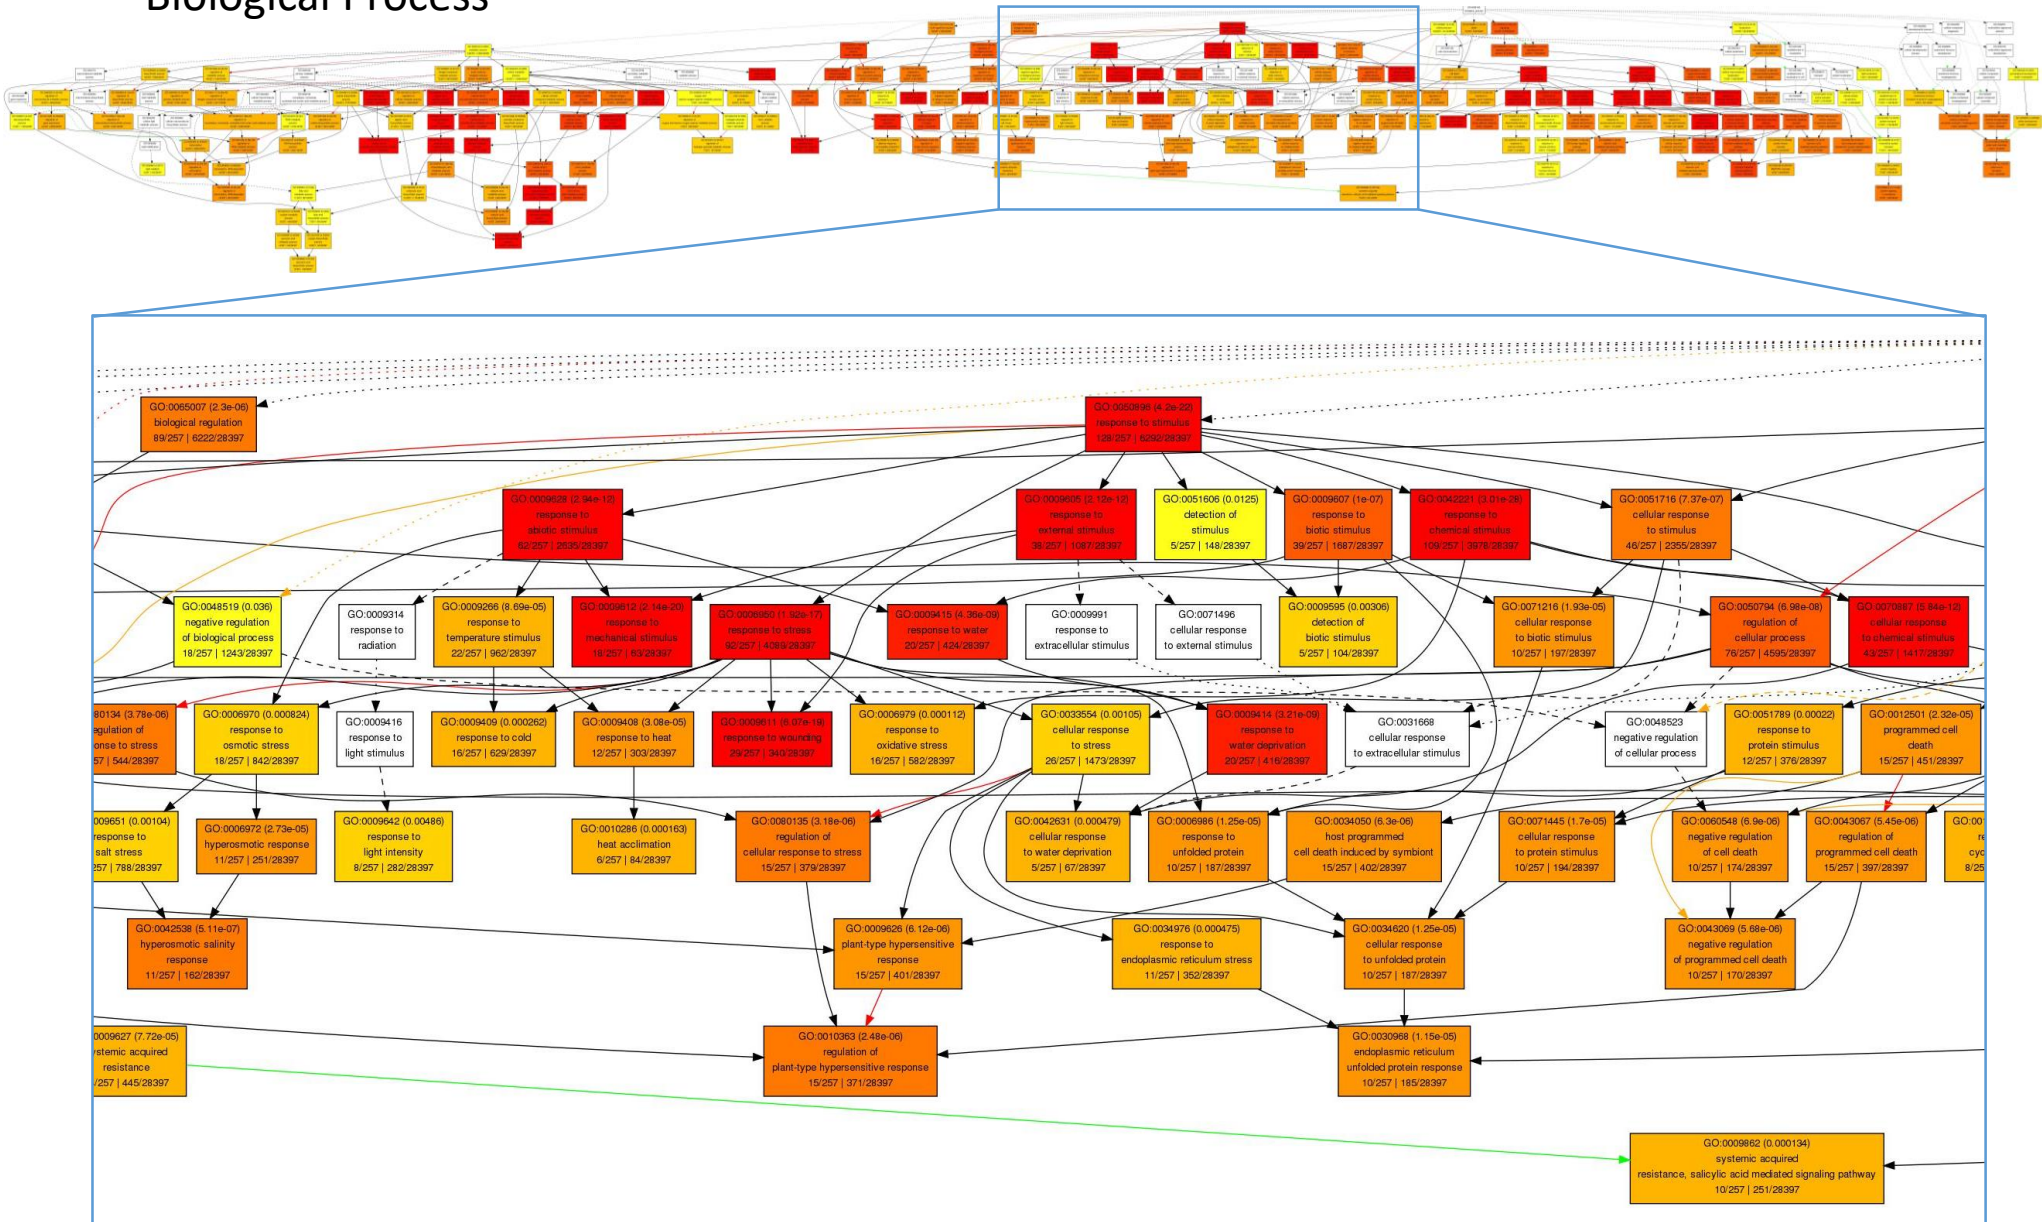

Supplementary Fig. S10 Gene ontology analysis of the common DEGs between *Os*bHHLH068- and *At*bHHLH112-overexpressing transgenic *Arabidopsis*.

# Cellular Component

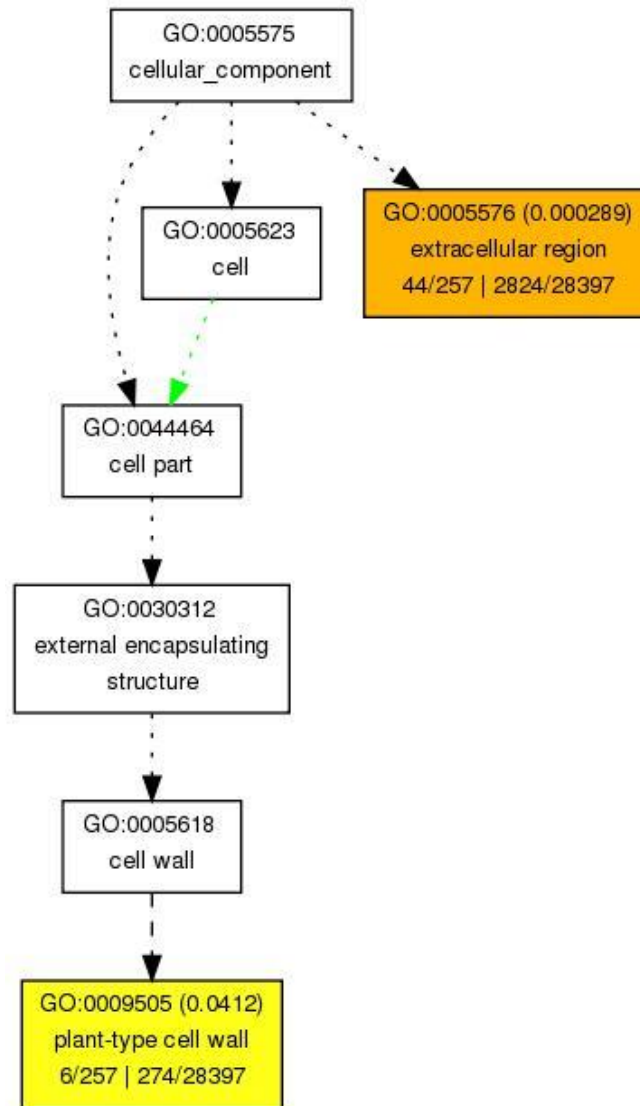

# Molecular Function

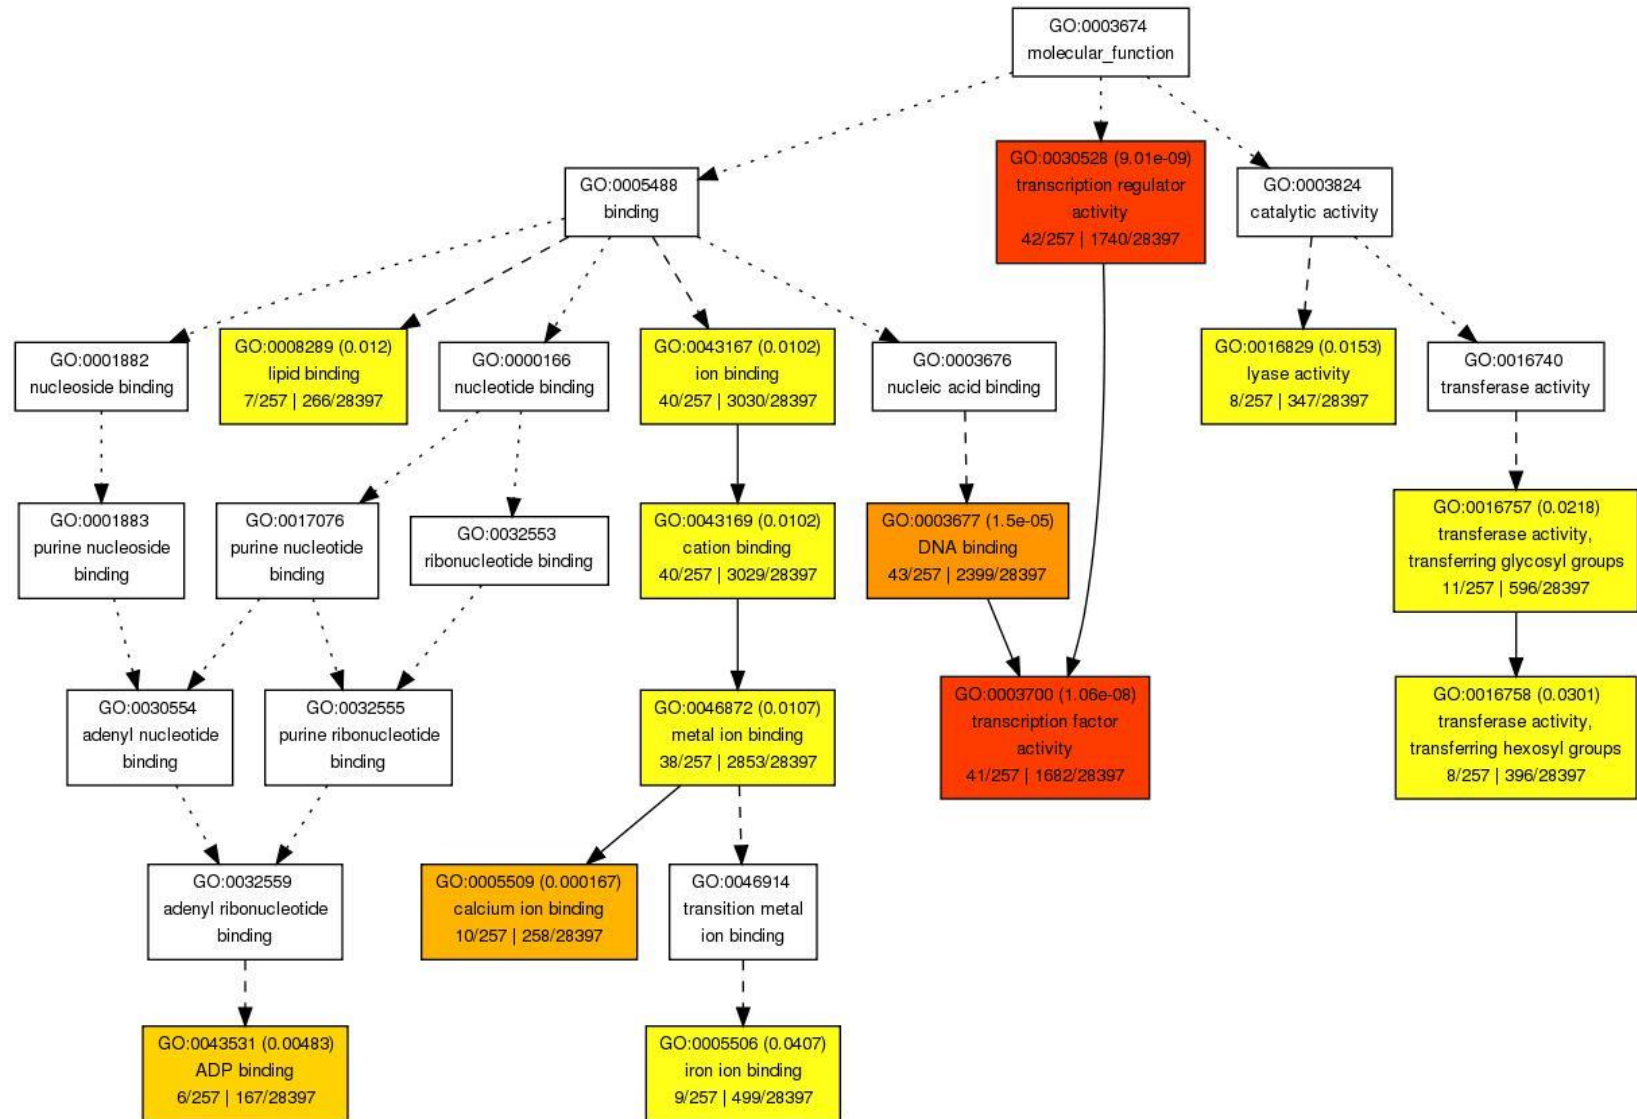

Supplement: 11103_2017_624_MOESM2_ESM.pdf [file 11103_2017_624_MOESM2_ESM.pdf]
