# Supplementary material for: The function of OsbHLH068 is partially redundant with its homolog, AtbHLH112, in the regulation of the salt stress response but has opposite functions to control flowering in Arabidopsis
Source: PubMed Central journal article supplement (PMC5504132; doi:10.1007/s11103-017-0624-6), 2017-06-19
Supplement: 11103_2017_624_MOESM3_ESM.pdf [file 11103_2017_624_MOESM3_ESM.pdf]

**Supplementary Table 1.** The 1-kb promoter region (FT, SOC1, Hd3a, and RFT1).

E-box: CANNTG

CAATTG

CAACTG

CAAGTG

CAAATG

CATTG

CATCTG

CATGTG

CATATG

CACTTG

CACCTG

CACGTG (as known as G-box)

CACATG

CAGTTG

CAGCTG

CAGGTG

CAGATG

>FT (AT1G65480)

ATAATATGGCCGCTTGTTTATAAAAAAAGAAGAGAAATAAAA CAATTG ATTTGGTTTATATTATTTA  
ATTGCAGATATCTTGTACTTAATTCATTTTGAGATAATTTTGCGTATTTGAGTTCGGACATTGGTAG  
GTATGGACGATGAAAATAACTGCCTTCATTCACATGTTTGAGATTTGTTTGTGCGACCATATAACAC  
AAGCGGCTAGAAAAATAGGTGACTATTCT CAAATG TCCTGGTTCTATCTAACCTGAAGGATCCCTTG  
TTCTACCTGGTATAACTACAAGAAAAGGCTGTTTTATAAAATATATCATTTCTTCTATGATTTCTAT  
CTCAACTTTTTTTTTTAGTTTTTTTCTTTTAGAACGTTTTTCGCTTTTGAATTTTTTAAAGAATTTTTTT  
TTTCTTTATATCTCTAAATAATAGTTTTTAAAACATAA CAAGTG ATACTGTAATTTTTTTTTTCTCTA  
TAACTTGGCGGTACCCTACTTTTTTCTTATTTTTATTAATAATCTTACTTTGTTATGATAAATTAT  
GTTAATATATGGCAAACCTAAATATATATGAACTACTGATTACTCATTATCATAATTAATATCTTT  
GTATAAAAGTAAATAATATTTAGTCGAGAGAGGTATCTTGTAAAGGAAATAAATCAAAAATTAGTG  
GCTAC CAAGTG GGAGATATAATTTGGAATATTTCCAGTGTATTAGTGTGGTGGGTTTGAATACCAC  
AAACAGAAATAAAAAGAAAGAAAATATGAAATAAGACGACAATGTGTGATGTACGTAGAATCAGTT  
TTAGATTCTAGTACATCAATAGACAAGAAAAGATTGTGGTTATGATTTACCGACCCGAGTTAATG  
CAAATCCGAAACAGTATAAATATGTGTAGAGGGTTCATGCCTATGATACAAATTAAGAAGCAGAAA  
CAAAAACAAGTAAAACAGAAACAATCAACACAGAGAAAC CACCTG TTTGTTCAAGATCAAAG

>SOC1 (AT2G45660)

TGTC CATATG TATCAAAATATGCTATTTTTGGTCTTTCTTAAGGCTTTTTTCCAAAATAAGTAAAGG  
ATGAGGTTTCAAGCGTCCATCATATTTGCGACA CATATG ACTGACTATTTAGCTCCTCCCTCTTTCT  
TTCTCTTATTTTATTATCTTTCTCCAAGAAAATAAAATAGAAAAGAAAATATATATGGTTTCACAAAC  
ACCATTACCATAACTACAACGAGAAGAGGATCTTTTTTAAGGAGAAAAGCAGAGAGAGAAGAGACGA  
GTGTGTGAAGTTTTTTTTGTCTTTTGTTCCTTTTATTACACACAAATAGATGAAACGAGGAAAGCTAC  
TTCTTTTGTACTTCCATAAAAAGGTTCTTCTTTTCGCAGAGAATCAACTTTGATCATCTTCTTCTCT  
TCTCTTTCTTTCTTCTTCTCCCTCCAGTAATGCTTATATAGTCTCCTCCTATATCTCTACCTATAACA  
TACACAAACCCTTTATCCTCGAAAGCTTCCCTCCTGGTTAGTTTTTATCAAACCCTTTTAGCCAATC  
GGTAAGATCTCTTCGTATGATCTTTTCTTTTTTCTTTTTGCTTTGACTCTGATGGATCTATAAACT  
TATATGGGTTTGGTTT CATTG GTTCGATTTGATGTGTTTGGTTTCTTTGTCTTAAATCTCATGAAA  
GGAGGTTGCATCCTTCAATTAACCGATAACAAAAGTTTCCATTACAGACTTATAGATCAGATACTT  
TAGATTGTTTTGCTTTTTGGGTACTTAATCTTTTCGTTGACTTCATCAGTCTTCTCCACCCAAACAA  
AAAAGTCATATTTTCGATCATATCTTCATTTTTTTAACCTACTCTCTTTGATTCATATATGAAATGGG

TTGTTTTATGTGTGTGACTAATCTTGTTATTGAGGTGGTTGCACCATTGATCTACCGTTTTCTTCAA  
TTTTTGAAAAATAATTTTTATTTTTTTTTCTGTGTGCAAGGGAAATTAATAAAGAAGAAGAT

>Hd3a (Os06g0157700)

AGGGAGTACTACATATAACCTCATTTTTTTACGGGTTGATAAGTTGCGGAAAAACCAACAAATTAGC  
AACAAATATGAGTAAAACCTGTATA **CATGTC** TCTTCTTAGCGATTTAAAAATCAATGCTGAAAAATAA  
ATTACAATAAAATTA AAAATCTCAAGATAATCTCTAAAATGTAGTTTTAAAATTTAAATTTTTGATTG  
CGACTGATAAGAAAAAAAA **CAAATG** ATGGGAGGCTATAT **CAACTG** TCAAACCTGGCTAATTTAGAAA  
GACGACATCGAATTCCTACAGATTGGAGGCAGAAAAGAGAGCCCGTCTCTGCCGGGTGCGTGCATG  
ATGCTCGATCATATCCCATCTCTCCTCACTTCATCATCAACAAGAACAAGAGGAACCTATATAGCTGC  
AAGATCTAGACTGAACTACTATAGCAACTAACTGTACTGTAGCTAGATTACGCTTAGCTATAGCTG  
CTGCTGCATCTATCTGTAAATTC CAACTACGACGTCGACTGCTGCAAGCTAGCTTGGCCGGCTAGCT  
AGATAGCTAGCTAGCTCAAAGAGAAAAGCTTTGCGAAATAGGAGTAACTAGCTAGCTCTAGCTAGGG  
CGCCATCGATGCGTGACCACCGAGCTCGCCTCGTCCACACGTACAGGAAGACGATGCAGAAAGCGGC  
CGGCATGCAGTACACTGACCGAGCTAAGAGAGAGAGAGAGATGATATTATCTTCTGCAGCTAAATT  
AAAGTGAAAGTTGGACATGGACATGGACATAGTAATTTTGCATGGCCATCATCTTGCCCTCCTATAT  
AAAGCGGCCATCTCACTCTCAACCACAGCTCGATCCAGCAGCCCTGCACCACACACAGTTCAGCTAG  
CAGATCACCTAGCTAGATAGCTGCCTCTATCACAGTATATTTGCTCCCTGCAACTTGCTGCTGCTGC  
AATAGCTAG **CAGCTG** CAGCTAGTAAGCAAACCTATAAACCTTCAGGGTTTTTTTGCAAGATCG

>RFT1 (Os06g0157500)

AGAATCAAAGCTCTCAAATAGTT **CAGCTG** TTGGTCCAGATTCTAAAAGCTATAGTTATAGAATT  
TATAAAGAAGCTAAAAGCCAGAAGCTAGGTAACCAGCTTTTCCAACTCTCAGAGCCTGGTTACCAA  
**A CAGCTG** TTCTTAACTCTGCCAAACATGCCCATAGTTAGCTTCATTATTTTACTGCTAGCTTCATTT  
ATTTTGGACGGGGTTAGTA **CATATG** TATCTGTCTCGAAATCGCCTCTGTAAATGGGGTCAGTTTCAG  
CACTTCTATCGACATGAAGAAGATAGAAAGGGCCATGCGAGAGAGAGTGTGTGAGAAAGAGAAGATT  
CTACCGGGCACAACAAAGTGTGTAAATGCATAAAGAAAAGATTCTACTGGGCACATCATAGTAAGGC  
TATTCTCAGCTCAATAACTAGGATGGTGTCCATAGCATTAAATAAGCTGCTACCTAATATGAAAAAT  
GATGTGG **CAAGTG** AGTAAATGAGGAAAGAGAAGAAAACAAGGTCTTGATGAGACATGGTTTCTACA  
CAACATTGAAGACAT **CATGTC** AGATAAATTTAATTTAAGCATGAAAAGTGGTGTGTTGATTGAAA  
AGTAGTGTCTAATACTAGTTTATTGATGATGTGAAGTTTATGAAAACCTACCGTGTAGTGTCTTGGGT  
TGGTACTGCCTAAAGGGGCGGCTAGCTATATAAACTGTA **CAGATG** CAGAGAAGCTTGCACAACCTAG  
TGCATCCCTGTCCTGTTTGGCTAGCTTAAACCTTCTGACATCTATCCTCTGGATTGAACGGCAGGA  
GATACCTAAGCTAGCTAGCAATCTCTATCGATCTGTTTGTGTTACATGTTTCAAGTTAAAGTTACTGAG  
AAATGCCTAGAGTTTTTCCGGCTAGCTTCATAAGTTAGTGGGTTAGCTGACCTAGATTCAAAGTCTA  
ATCCTTTTATTTATTTGATATTAGATATCCTAACGTTTTTGTAGTTAGAGGTTATTAATTTGAC

**Supplementary Table 2.** Primer sequences.

| <b>Genotyping</b>              | <b>Primer Name</b> | <b>Sequence (5'-3')</b>   |
|--------------------------------|--------------------|---------------------------|
|                                | 35S-F              | AGAGGACCTAACAGAACTCG      |
|                                | 068-R              | CACGCCATGAGAGCTCGTCGTAC   |
|                                | P1                 | TTCGGATCATTCTTGTCCACC     |
|                                | P2                 | GTAGATATTATCTGCGGAGTGG    |
|                                | P3                 | ATTTTGCCGATTTTCGGAAC      |
|                                | P4                 | GAACCTTTTACGATCCCGAACC    |
|                                | P5                 | CAGTGAATTTGGTTCGTGAAGG    |
|                                | 112p-F             | CACTTCTTCGAAAAGCTAAGCAGC  |
|                                | GFP-R              | GTGCAGATGAACTTCAGGGTCAGC  |
| <b>RT-PCR</b>                  |                    |                           |
|                                | <b>Primer Name</b> | <b>Sequence (5'-3')</b>   |
| <i>OsHLH068</i> (Os04g0631600) | OsHLH068-RT-F      | GTACGACGAGCTCTCATGGCGTG   |
|                                | OsHLH068-RT-R      | GGCTCCATGAGGCTCCTCAGCAG   |
| <i>OsActin1</i> (Os03g0718100) | OsActin1-RT-F      | GGAAGTGGTATGGTCAAGGCTGG   |
|                                | OsActin1-RT-R      | CACACGGAGCTCGTTGTAGAAGG   |
| <b>q-PCR</b>                   |                    |                           |
|                                | <b>Primer Name</b> | <b>Sequence (5'-3')</b>   |
| <i>OsSOS1</i> (Os12g0641100)   | OsSOS1-Q-F         | GACACTGGGAATGTTCTATGC     |
|                                | OsSOS1-Q-R         | CCATGAAGCACCGTGCCTCTCG    |
| <i>OsHLH068</i> (Os04g0631600) | OsHLH068-Q-F       | TGCTGGTCTGCATGAGTTTC      |
|                                | OsHLH068-Q-R       | GCTTGCTGCAGTGCTAGGTT      |
| <i>OsActin1</i> (Os03g0718100) | OsActin1-Q-F       | CTCAGCACATTCCAGCAGATGTG   |
|                                | OsActin1-Q-R       | GATAACAGCTCCTCTTGGCTTAGC  |
| <i>MYB4</i> (At4g38620)        | MYB4-Q-F           | CAAGGGCATGGAAAGTCAAC      |
|                                | MYB4-Q-R           | TTGCTGCTACCTCCGACTAC      |
| <i>PP2C5</i> (At2g40180)       | PP2C5-Q-F          | ATCTGATGGCCTGTGGGACA      |
|                                | PP2C5-Q-R          | CCGATAGCTCAGCCAGTTTC      |
| <i>CBF2</i> (At4g25470)        | CBF2-Q-F           | GCTCCGATTACGAGTCTCCG      |
|                                | CBF2-Q-R           | TCTTCCTTCCCGCTGGTTTC      |
| <i>ASC11</i> (At4g08040)       | ASC11-Q-F          | CCAGGCTCATCGTGTTCATTGCGA  |
|                                | ASC11-Q-R          | GCAACCTCCATCGTTTGGTCCGA   |
| <i>LFY</i> (At5g61850)         | LFY-Q-F            | CGGCTTAGATTATCTGTTCCACTTG |
|                                | LFY-Q-R            | ACTCGCTCCTGATTTCTTCGC     |
| <i>SOC1</i> (At2g45660)        | SOC1-Q-F           | CTCTTGGGAGAAGGCATAGGAA    |
|                                | SOC1-Q-R           | TCAAGCTGTTGCTCAATCTGTTG   |
| <i>FT</i> (At1g65480)          | FT-Q-F             | CAACCCTCACCTCCGAGAATAT    |
|                                | FT-Q-R             | TTGCCAAAGGTTGTTCCAGTT     |
| <i>AtActin2</i> (At3g18780)    | AtActin2-Q-F       | GTGGATTCCAGCAGCTTCCAT     |
|                                | AtActin2-Q-R       | GCTGAGAGATTCAGATGCCCA     |
